# Supplementary material for: Graphene oxide based BCNO hybrid nanostructures: tunable band gaps for full colour white emission
Source: Royal Society of Chemistry journal article supplement (doi:10.1039/c4ra02775b), 2014-01-01
Supplement: c4ra02775b1.pdf [file c4ra02775b1.pdf]

## Supporting Information

### Graphene oxide based BCNO hybrid nanostructures: tunable band gaps for full color white emission

Zengyong Chu,<sup>\*a</sup> Yue Kang,<sup>a</sup> Zhenhua Jiang,<sup>a</sup> Gongyi Li,<sup>a</sup> Tianjiao Hu,<sup>a</sup> Jing Wang,<sup>a</sup> Zhongfu Zhou,<sup>b</sup> Yihe Li<sup>a</sup> and Xiaojie Wang<sup>a</sup>

<sup>a</sup>College of Science, National University of Defense Technology, Changsha 410073, P. R. China.

<sup>b</sup>Institute of Mathematics and Physics, Aberystwyth University, Aberystwyth, Ceredigion, SY23 3BZ, UK.

E-mail: [chuzy@nudt.edu.cn](mailto:chuzy@nudt.edu.cn)

Tel/Fax: +86-731-84574250

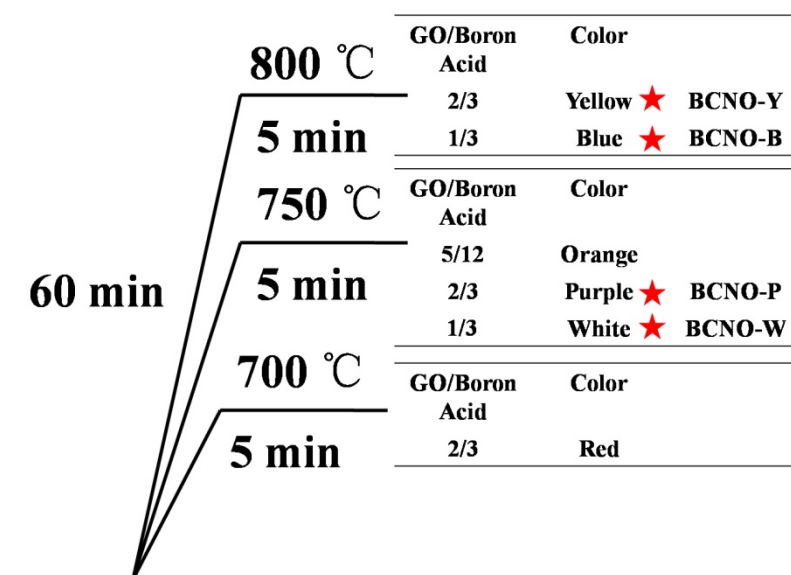

Figure S1. The weight ratios of GO/boron acid, heating procedures and lighting properties of the BCNO phosphors. The weigh ratio of urea / boron acid is fixed as 20. Four typical phosphors emitting yellow, blue, purple and white were marked with stars, and renamed as BCNO-Y, BCNO-B, BCNO-P, and BCNO-W respectively.

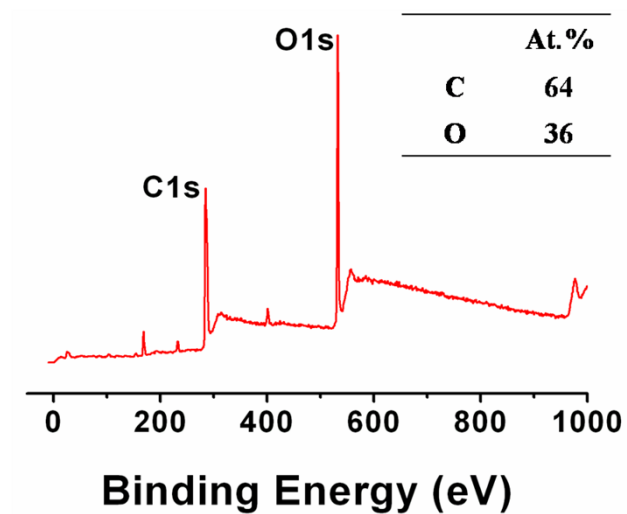

Figure S2. XPS full spectrum profiles of GO. It indicates that the atomic contents of C, and O are 64 at%, and 36 at% respectively.

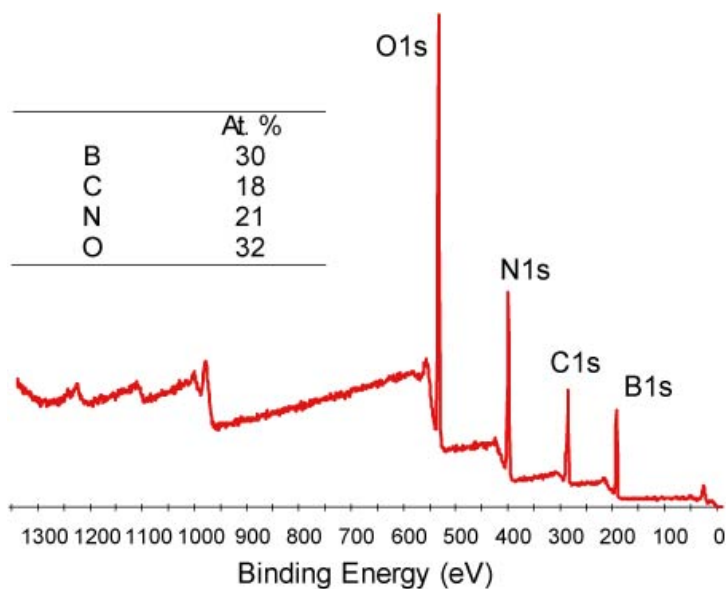

Figure S3. XPS profiles of BCNO-W phosphor. It indicates the atomic contents of B, C, N and O are 30 at%, 18 at%, 21 at% and 32 at% respectively.

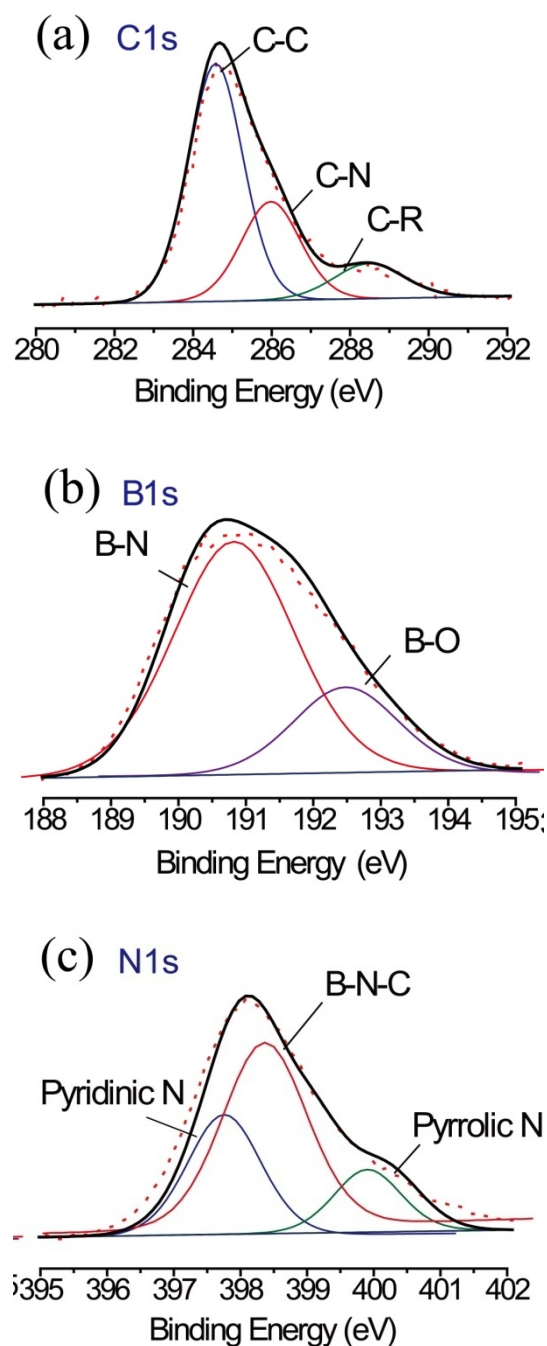

Figure S4. XPS profiles of BCNO-W phosphor recovered from warm water washing. The curves are deconvolved by Gaussian fitting, thereby indicating possible bonding structures. It shows that the recovered material is B-N-C type doped graphene containing only a slight fraction of boron oxide.

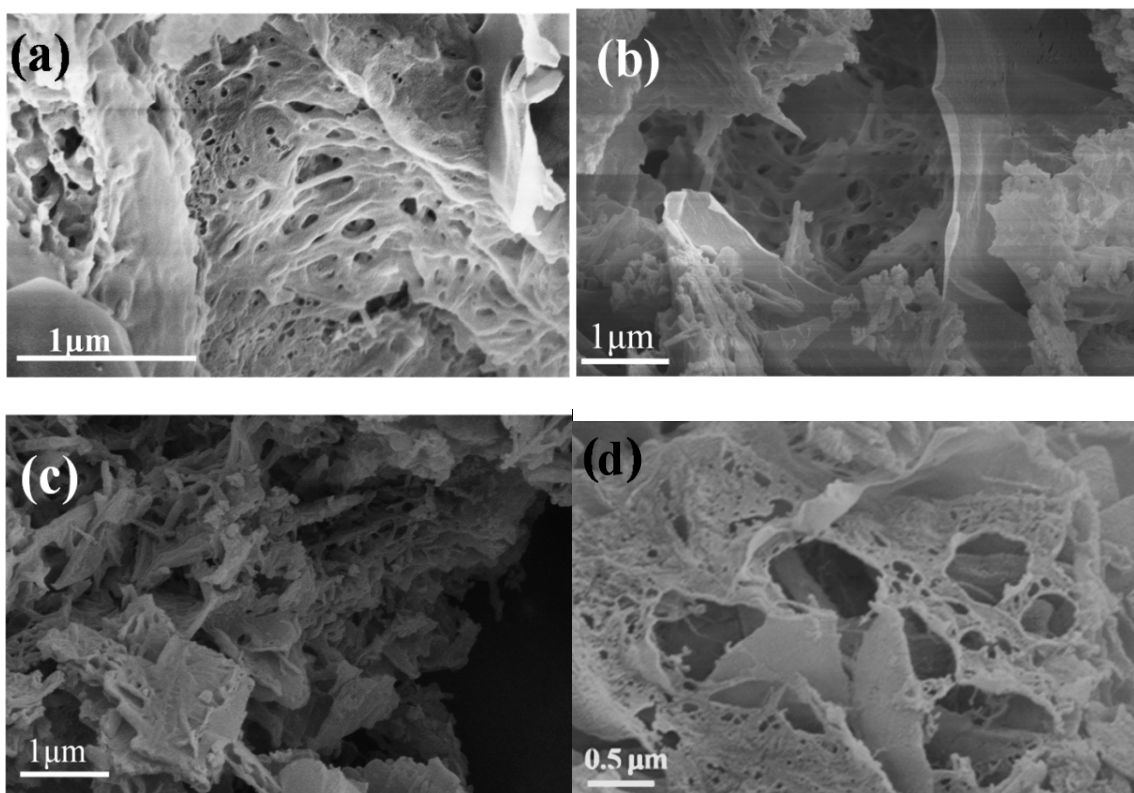

Figure S5. SEM images of (a) BCNO-Y, (b) BCNO-B, (c) BCNO-P and (d) BCNO-W phosphors. Porous graphene can be clearly observed. The image of BCNO-W phosphor is shown for comparison.

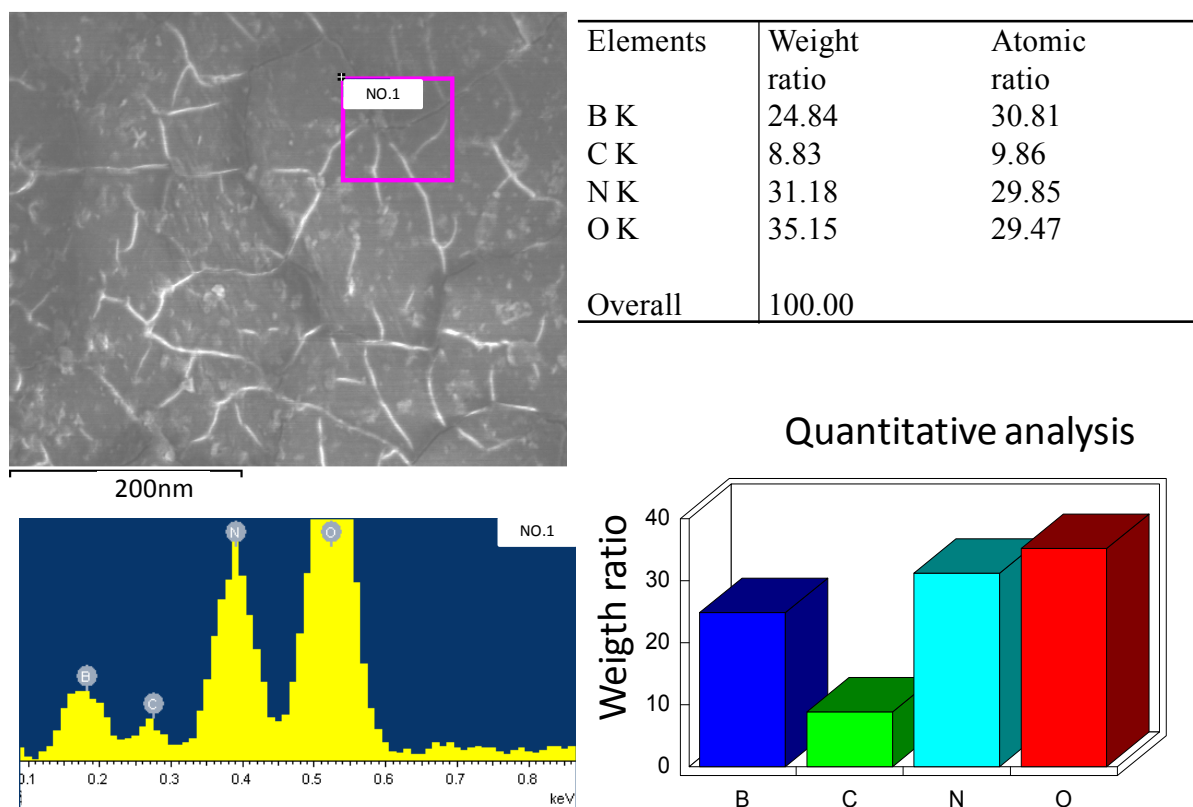

Figure S6. Energy dispersive X-ray spectroscopy (EDS) analysis of BCNO-W phosphor, indicating the B-C-N-O quaternary compound.

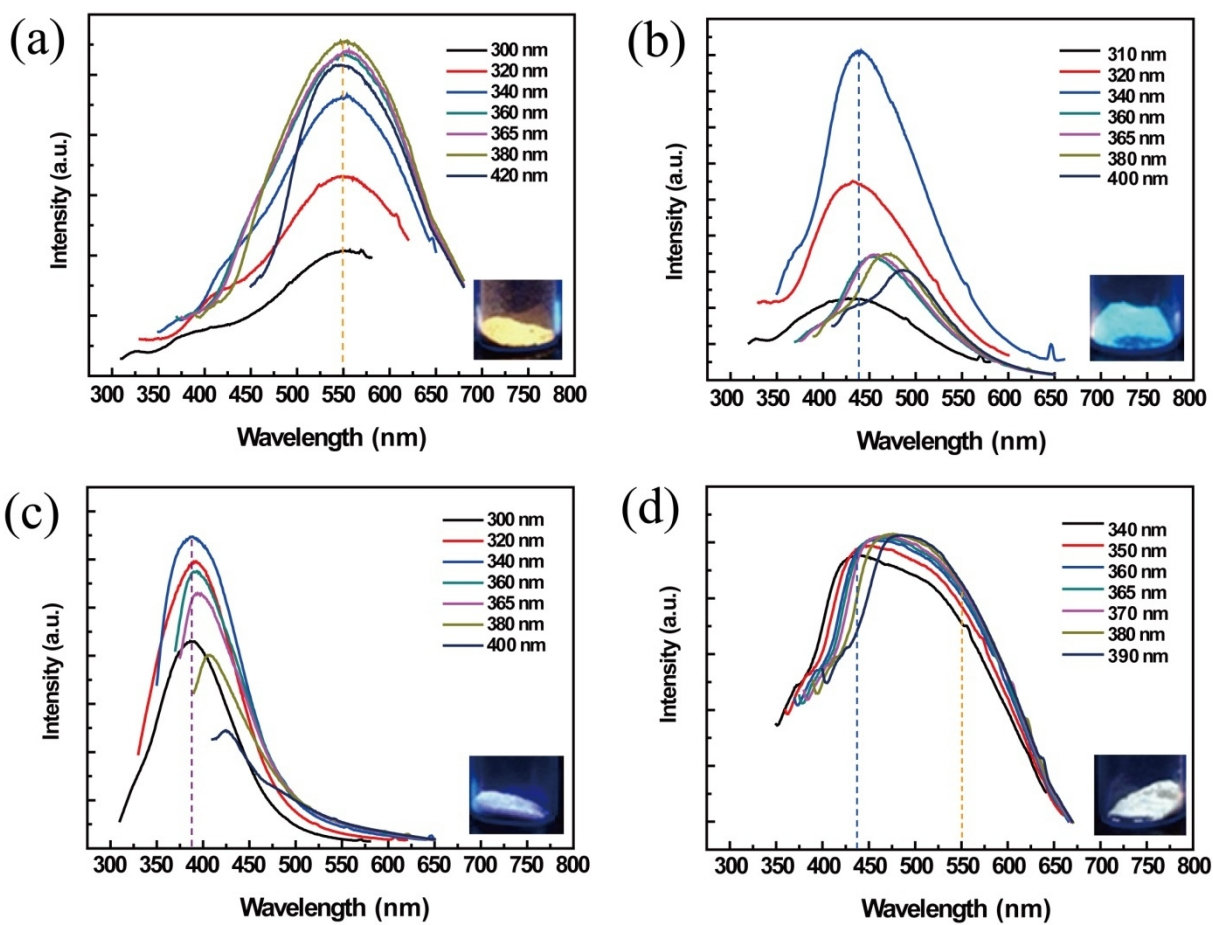

Figure S7. PL spectra of (a) BCNO-Y, (b) BCNO-B, (c) BCNO-P and (d) BCNO-W phosphors. Insets are the corresponding powders excited at 365nm. The spectra of BCNO-W phosphor is shown for comparison.

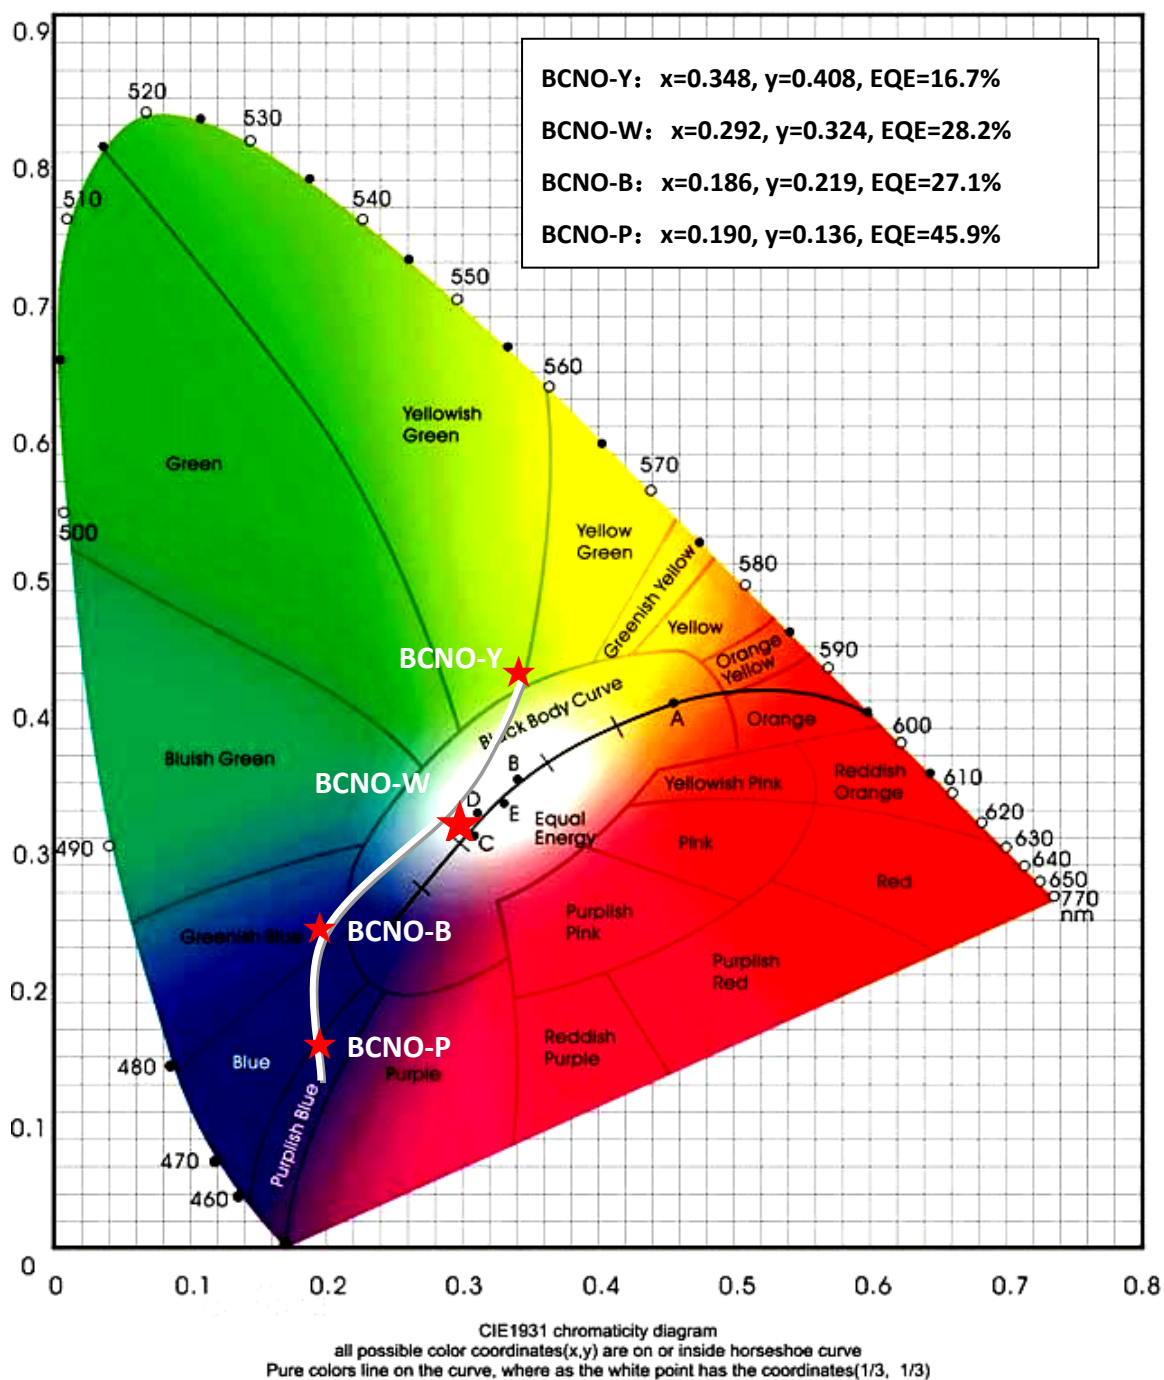

Figure S8. A Commission Internationale de l'Eclairage (CIE) diagram showing the emission colors of BCNO-Y, BCNO-W, BCNO-B, and BCNO-P phosphors excited at 365nm. The line is drawn to guide eyes.



Table S2. Synthesis parameters and optical properties of BCNO-Y, BCNO-W, BCNO-B and BCNO-P phosphors.

| Phosphors | Weight ratio, (GO/Boron acid/Urea) | Highest treatment temperature in air (°C) | Powder color under solar light | Emission color excited at 365nm | Peak emission excited at 365nm (nm) | CIE coordinate excited at 365nm, (x,y) | Extenal quantum efficiency (EQE) (%) | First band gap (eV) | Second band gap (eV) |
|-----------|------------------------------------|-------------------------------------------|--------------------------------|---------------------------------|-------------------------------------|----------------------------------------|--------------------------------------|---------------------|----------------------|
| BCNO-Y    | 20/30/600                          | 800                                       | Light gray                     | Yellow Green                    | 550                                 | (0.348,0.408)                          | 16.7                                 | 3.3 (375nm)         | 2.1 (590nm)          |
| BCNO-B    | 10/30/600                          | 800                                       | White                          | Greenish Blue                   | 438                                 | (0.186,0.219)                          | 27.1                                 | 4.3 (288nm)         | 2.3 (539nm)          |
| BCNO-P    | 20/30/600                          | 750                                       | White                          | Purperlish Blue                 | 388                                 | (0.190,0.236)                          | 45.9                                 | 4.9 (253nm)         | 3.7 (335nm)          |
| BCNO-W    | 10/30/600                          | 750                                       | White                          | White                           | 445                                 | (0.292,0.342)                          | 28.2                                 | 5.9 (210nm)         | 3.4(365nm)           |
